# Supplementary material
Source: PubMed Central journal article supplement (PMC5084894)

*Supplement to "the optimal protocol for measuring an albuminuria class transition in clinical trials in diabetic kidney disease"*

**Authors:**

T.F. Tobias F. Kröpelin, Dick de Zeeuw, Giuseppe Remuzzi, Rudy Bilous, Hans-Henrik Parving, Hiddo J.L. Heerspink

**Content:**

**Figure 1:** Magnitude and precision of the drug effect estimate with a single urine collection and different time-intervals between study visits.

**Figure 2:** Magnitude and precision of the drug effect estimate with a single urine collection and various percentage albuminuria increases *without* a class transition and without a confirmatory visit.

**Supplement Figure 1:** Magnitude and precision of the drug effect estimate with a single urine collection and different time-intervals between study visits. Solid circles represents the estimate of the treatment effect and the horizontal line indicates the 95% confidence interval.

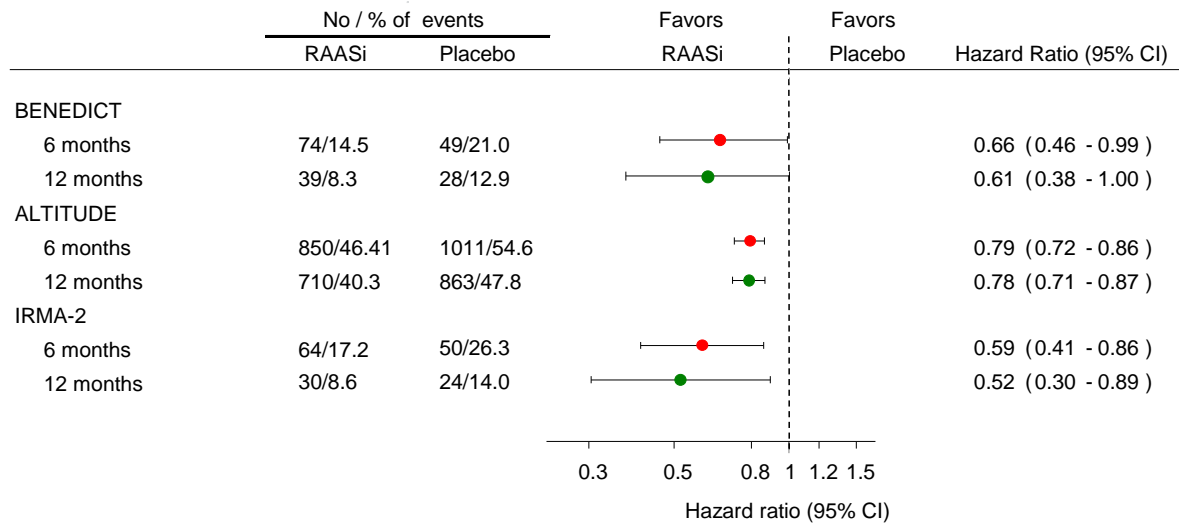

Supplement Figure 2: Magnitude and precision of the drug effect estimate with a single urine collection and various percentage albuminuria increases *without* a class transition and without a confirmatory visit. Solid circles represents the estimate of the treatment effect and the horizontal line indicates the 95% confidence interval.

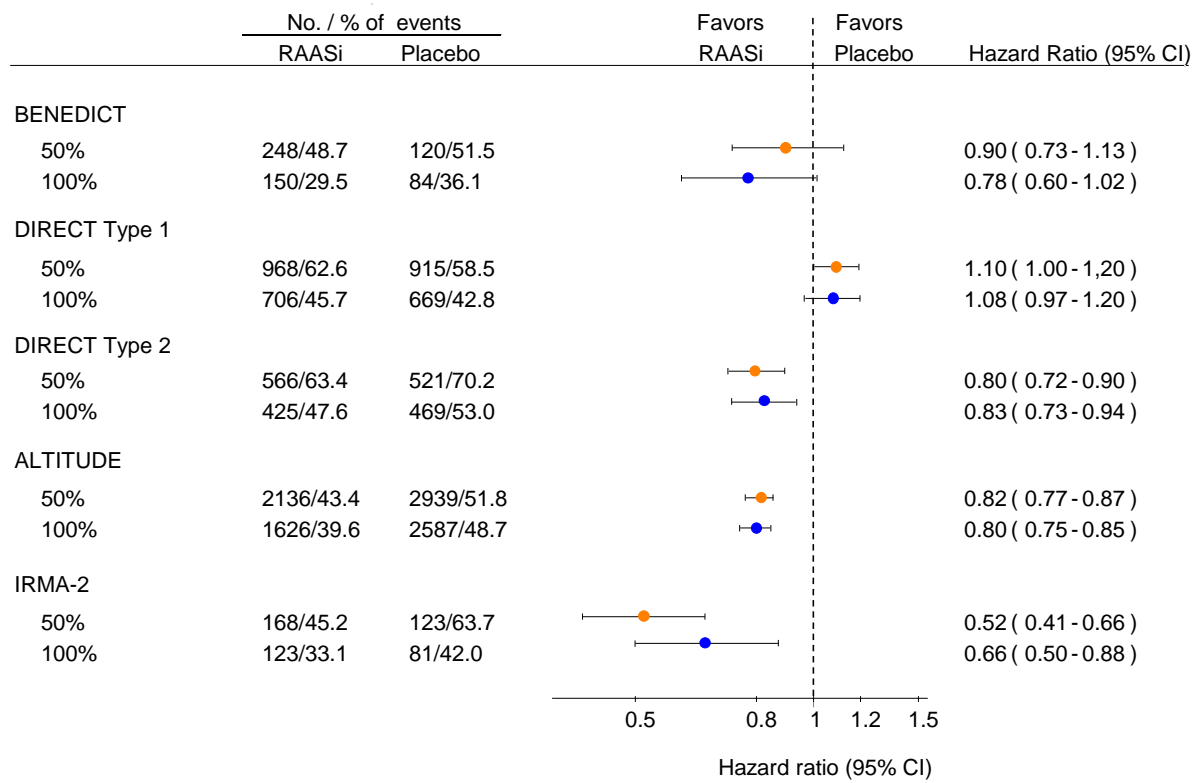

Supplement: ASN.2015101150SupplementaryData.pdf [file ASN.2015101150SupplementaryData.pdf]
